# Supplementary material for: Associations between Taste Perception Profiles and Empirically Derived Dietary Patterns: An Exploratory Analysis among Older Adults with Metabolic Syndrome
Source: Nutrients. 2021 Dec 29;14(1):142. doi: 10.3390/nu14010142 (PMC8747383; doi:10.3390/nu14010142)
Supplement: Supplementary file 1 [file nutrients-14-00142-s001.zip › nutrients-1463880-supplementary.pdf]

## ONLINE SUPPORTING MATERIAL

### **Associations between taste perception profiles and empirically derived dietary patterns: An exploratory analysis among older adults with metabolic syndrome**

Julie E. Gervis, Rebeca Fernández-Carrión, Kenneth K. H. Chui, Jiantao Ma, Oscar Coltell, Jose V. Sorli, Eva M. Asensio, Carolina Ortega-Azorín, José Alejandro Pérez-Fidalgo, Olga Portolés, Alice H. Lichtenstein<sup>†</sup>, Dolores Corella<sup>†</sup>

<sup>†</sup> These authors contributed equally as senior authors

#### **Table of Contents**

**Supplementary Figure S1.** Flowchart of PREDIMED-Plus Valencia participants.

**Supplementary Figure S2.** Scree plot of the eigenvalues used to determine the number of principal components to retain.

**Supplementary Table S1.** Food groups and food items for dietary pattern analysis.

**Supplementary Table S2.** Rotated factor loadings for all food groups from Principal Component Analysis.

**Supplementary Table S3.** ORs and corresponding 95% CIs of moderate or high relative to low adherence to the Veg/Fruit/WG dietary pattern among participants with each taste perception profile.

**Supplementary Table S4.** ORs and corresponding 95% CIs of moderate or high relative to low adherence to the Non-EVOO/Sweet/RG dietary pattern among participants with each taste perception profile.

**Supplementary Table S5.** ORs and corresponding 95% CIs of moderate or high relative to low adherence to the Alch/Salt/AnimFat dietary pattern among participants with each taste perception profile.

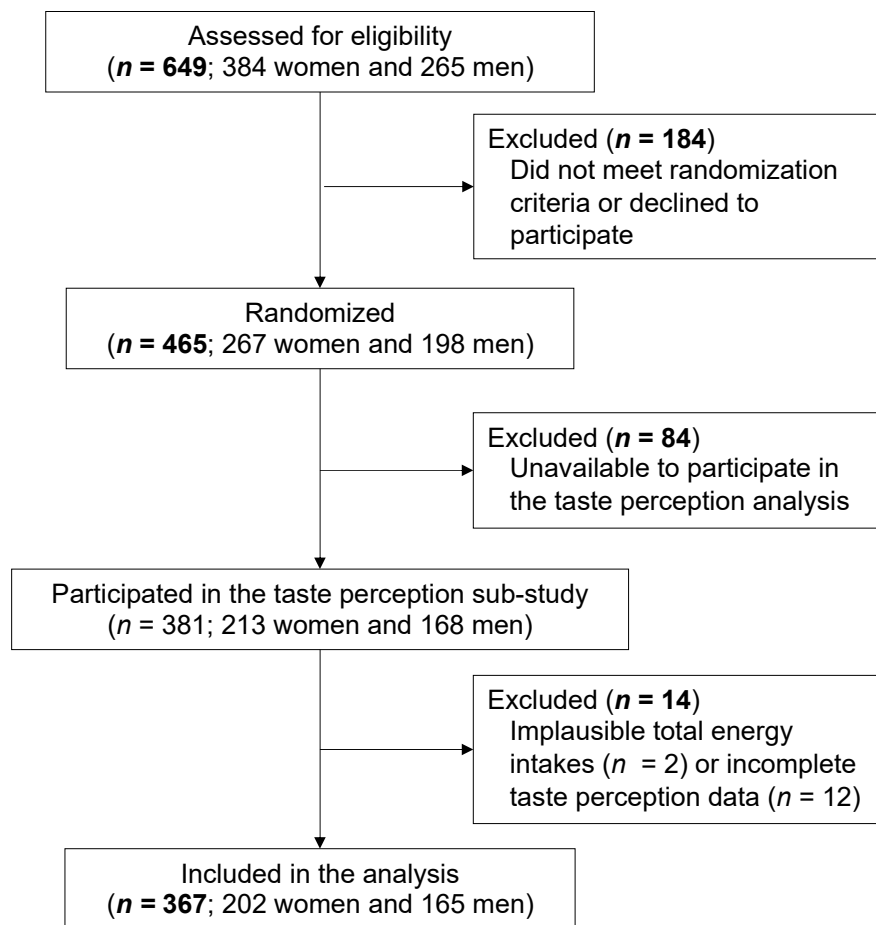

**Supplementary Figure S1.** Flowchart of PREDIMED-Plus Valencia participants.

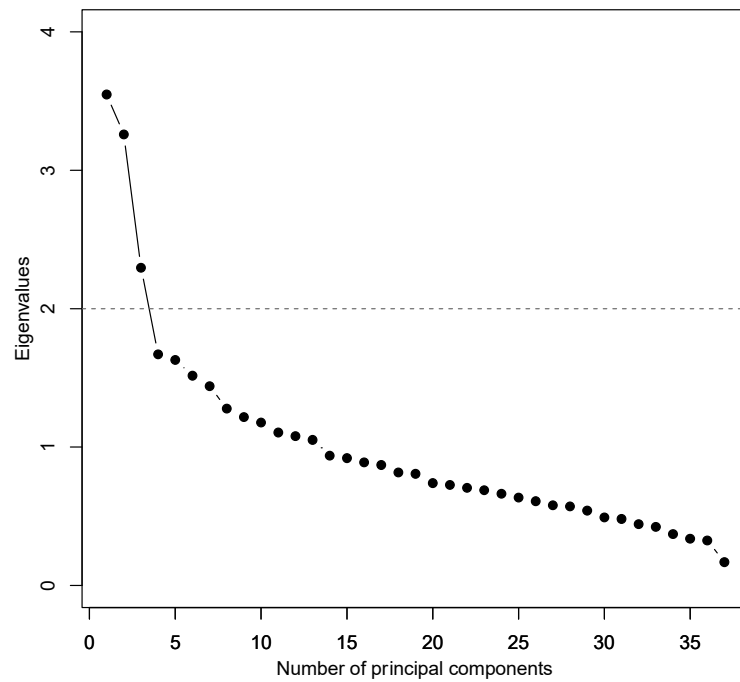

**Supplementary Figure S2.** Scree plot of the eigenvalues used to determine the number of principal components to retain. Ultimately, three principal components were retained based on their eigenvalues  $>2$ .

**Supplementary Table S1.** Food groups and food items for dietary pattern analysis.

| <b>Food groups</b>                                            | <b>Food items</b>                                                                                                                                           |
|---------------------------------------------------------------|-------------------------------------------------------------------------------------------------------------------------------------------------------------|
| Fresh fish                                                    | White fish; blue fish                                                                                                                                       |
| Shellfish                                                     | Canned natural fish; fish in oil; salted fish                                                                                                               |
| Canned & salted fish                                          | Oysters, clams, mussels; squid, octopus, cuttlefish; prawns, crayfish                                                                                       |
| Poultry                                                       | Chicken with/without skin                                                                                                                                   |
| Red meat                                                      | Beef, pork; lamb; rabbit; liver; hamburgers                                                                                                                 |
| Processed meat                                                | Serrano ham; cooked ham; sausages; pates; bacon                                                                                                             |
| Eggs                                                          |                                                                                                                                                             |
| Low & no-fat dairy                                            | Nonfat yogurt; low-fat milk; skim milk                                                                                                                      |
| Full-fat dairy                                                | Full-fat yogurt; whole milk; sweet cream; cheese, cheese curds; spreads; condensed milk                                                                     |
| Cruciferous vegetables                                        | Cabbage, cauliflower, broccoli                                                                                                                              |
| Leafy green vegetables                                        | Chard, spinach; lettuce, endive                                                                                                                             |
| Red & orange vegetables                                       | Tomatoes; carrots, pumpkin                                                                                                                                  |
| Other vegetables                                              | Peppers; asparagus; green beans; onions; mushrooms; zucchini, eggplant; cucumber; gazpacho                                                                  |
| Citrus fruits                                                 | Oranges, tangerines, and grapefruits                                                                                                                        |
| Non-citrus fruits                                             | Strawberries; watermelon; melons; kiwi; bananas; apples, pears; cherries, plums; peaches, apricots, nectarines; grapes; dried fruits; fruit cups (in syrup) |
| Potatoes                                                      | Roasted and cooked potatoes; homemade fried potatoes; commercial fried potatoes                                                                             |
| Legumes                                                       | Lentils; dried beans; chickpeas; peas and beans                                                                                                             |
| Nuts                                                          | Almonds; pistachios; walnuts; other nuts                                                                                                                    |
| Whole grains                                                  | Whole grain bread; whole grain pasta; whole grain fiber biscuits; brown rice; muesli, oats                                                                  |
| Refined grains                                                | White bread; white rice; white spaghetti or macaroni; breakfast cereals                                                                                     |
| EVOO                                                          |                                                                                                                                                             |
| Refined olive oil                                             | Refined olive oil; pomace olive oil                                                                                                                         |
| Vegetable oil                                                 | Corn oil; sunflower oil; soy oil; mixture of vegetable oils; margarines                                                                                     |
| Chocolate & dairy desserts                                    | Chocolate biscuits; cocoa powder; chocolates and bonbons; custard, pudding; ice cream                                                                       |
| Biscuits, pastries & Cakes                                    | Biscuits; homemade pastries; commercial pastries; donuts; cupcakes; muffins; cake; turrón; shortbread, marzipan; pastries                                   |
| Olives                                                        | Olives                                                                                                                                                      |
| Tomato sauces & mustard                                       | Fried tomato sauce (sofrito) and ketchup; mustard                                                                                                           |
| Jelly, sugar & honey                                          |                                                                                                                                                             |
| Butter & mayo                                                 | Butter; mayonnaise                                                                                                                                          |
| Salty snacks                                                  | Other snacks besides fried potatoes (e.g., chips, pretzels)                                                                                                 |
| Croquettes                                                    | Croquettes, fritters, and dumplings                                                                                                                         |
| Soups & cream packets                                         |                                                                                                                                                             |
| Pizza                                                         |                                                                                                                                                             |
| Coffee                                                        | Decaf coffee; caffeinated coffee                                                                                                                            |
| Tea                                                           |                                                                                                                                                             |
| SSBs                                                          | Sodas with sugar; bottled fruit juice; non-alcoholic wine (e.g., musts)                                                                                     |
| Natural fruit juices                                          | Orange juice; natural fruit juice                                                                                                                           |
| Wine                                                          | Rosé; sweet wine; young red wine; aged red wine; white wine; champagne                                                                                      |
| Beer                                                          |                                                                                                                                                             |
| Spirits                                                       | Liqueurs, anise; whiskey, gin, vodka                                                                                                                        |
| EVOO, extra virgin olive oil; SSBs, sugar-sweetened beverages |                                                                                                                                                             |

**Supplementary Table S2.** Rotated factor loadings for all food groups from Principal Component Analysis<sup>1</sup>

| Veg/Fruit/WG               |        | Non-EVOO/Sweet/RG          |        | Alch/Salt/AnimFat          |        |
|----------------------------|--------|----------------------------|--------|----------------------------|--------|
| Other veg                  | 0.66*  | Refined olive oil          | 0.73*  | Wine                       | 0.55*  |
| Leafy green veg            | 0.63*  | Vegetable oil              | 0.47*  | Olives                     | 0.54*  |
| Red & orange veg           | 0.62*  | Biscuits, pastries & cakes | 0.44*  | Beer                       | 0.52*  |
| Non-citrus fruit           | 0.61*  | Refined grains             | 0.40*  | Spirits                    | 0.50*  |
| Whole grains               | 0.45*  | Croquettes                 | 0.30*  | Eggs                       | 0.40*  |
| Canned/salted fish         | 0.43*  | Butter & mayo              | 0.27*  | Shellfish                  | 0.36*  |
| Cruciferous veg            | 0.32*  | Chocolate & dairy desserts | 0.27*  | Canned/salted fish         | 0.33*  |
| Low-fat dairy              | 0.30*  | SSBs                       | 0.25*  | Red meat                   | 0.27*  |
| Tea                        | 0.27*  | Canned/salted fish         | 0.22*  | Processed meat             | 0.25*  |
| Poultry                    | 0.24*  | Tomato sauces & mustard    | 0.19   | Butter & mayo              | 0.22*  |
| Fresh fish                 | 0.22*  | Olives                     | 0.15   | Other veg                  | 0.19   |
| Shellfish                  | 0.18   | Soup & cream packets       | 0.11   | Pizza                      | 0.17   |
| Refined olive oil          | 0.18   | Poultry                    | 0.10   | Potatoes                   | 0.16   |
| Natural fruit juices       | 0.18   | Low-fat dairy              | 0.10   | Tomato sauces & mustard    | 0.16   |
| Potatoes                   | 0.15   | Non-citrus fruit           | 0.09   | Poultry                    | 0.14   |
| Nuts                       | 0.14   | Pizza                      | 0.09   | Red & orange veg           | 0.13   |
| Chocolate & dairy desserts | 0.11   | Potatoes                   | 0.08   | Fresh fish                 | 0.13   |
| Citrus fruits              | 0.09   | Coffee                     | 0.05   | Chocolate & dairy desserts | 0.12   |
| Eggs                       | 0.07   | Eggs                       | 0.04   | Croquettes                 | 0.12   |
| Pizza                      | 0.06   | Red meat                   | 0.02   | Coffee                     | 0.12   |
| SSBs                       | 0.04   | Full-fat dairy             | 0.01   | Refined grains             | 0.06   |
| EVOO                       | 0.03   | Shellfish                  | 0.00   | Full-fat dairy             | 0.05   |
| Red meat                   | 0.02   | Other veg                  | -0.02  | SSBs                       | 0.05   |
| Legumes                    | 0.02   | Citrus fruits              | -0.03  | Salty snacks               | 0.05   |
| Coffee                     | 0.00   | Beer                       | -0.03  | Leafy green veg            | 0.04   |
| Olives                     | -0.01  | Cruciferous veg            | -0.06  | EVOO                       | 0.04   |
| Jelly, sugar & honey       | -0.04  | Red & orange veg           | -0.06  | Jelly, sugar & honey       | 0.02   |
| Processed meat             | -0.05  | Salty snacks               | -0.06  | Refined olive oil          | 0.01   |
| Vegetable oil              | -0.05  | Tea                        | -0.07  | Natural fruit juices       | 0.00   |
| Biscuits, pastries & cakes | -0.09  | Leafy green veg            | -0.09  | Biscuits, pastries & cakes | -0.02  |
| Tomato sauces & mustard    | -0.13  | Spirits                    | -0.12  | Tea                        | -0.02  |
| Butter & mayo              | -0.13  | Processed meat             | -0.14  | Soup & cream packets       | -0.07  |
| Wine                       | -0.13  | Jelly, sugar & honey       | -0.17  | Cruciferous veg            | -0.09  |
| Soup & cream packets       | -0.14  | Natural fruit juices       | -0.19  | Legumes                    | -0.15  |
| Salty snacks               | -0.13  | Wine                       | -0.29* | Vegetable oil              | -0.15  |
| Full-fat dairy             | -0.20  | Whole grains               | -0.31* | Citrus fruits              | -0.16  |
| Spirits                    | -0.25* | Legumes                    | -0.33* | Nuts                       | -0.18  |
| Beer                       | -0.25* | Fresh fish                 | -0.33* | Non-citrus fruit           | -0.20  |
| Croquettes                 | -0.30* | Nuts                       | -0.37* | Whole grains               | -0.23* |
| Refined grains             | -0.47* | EVOO                       | -0.73* | Low-fat dairy              | -0.25* |

<sup>1</sup>Values are rotated factor loadings from PCA, arranged in descending order from higher factor loading (highest consumption) to lowest factor loading (lowest consumption). Food groups with a factor loading >|0.20| were considered to contribute significantly to a respective dietary pattern and were marked with an asterisks (\*). Alch/Salt/AnimFat, Alcohol, Salty Foods, and Animal Fats dietary pattern; EVOO, extra virgin olive oil; Non-EVOO/Sweet/RG, Non-EVOO, Sweets, and Refined Grains dietary pattern; SSBs, sugar-sweetened beverages; Veg/Fruit/WG, Vegetables, Fruits, and Whole Grains dietary pattern.

**Supplementary Table S3.** ORs and corresponding 95% CIs of moderate or high relative to low adherence to the Veg/Fruit/WG dietary pattern among participants with each taste perception profile.

|                                | Reference taste perception profiles |        |                   |        |                   |        |                      |       |                     |        |                    |       | $p^3$ |
|--------------------------------|-------------------------------------|--------|-------------------|--------|-------------------|--------|----------------------|-------|---------------------|--------|--------------------|-------|-------|
|                                | Low All                             |        | High Bitter       |        | High Umami        |        | Low Bitter and Umami |       | High All But Bitter |        | High All But Umami |       |       |
|                                | OR (95% CI)                         | $p^2$  | OR (95% CI)       | $p^2$  | OR (95% CI)       | $p^2$  | OR (95% CI)          | $p^2$ | OR (95% CI)         | $p^2$  | OR (95% CI)        | $p^2$ |       |
| Low All                        |                                     |        |                   |        |                   |        |                      |       |                     |        |                    |       |       |
| Moderate                       | 1.00                                | –      |                   |        |                   |        |                      |       |                     |        |                    |       |       |
| High                           | 1.00                                | –      |                   |        |                   |        |                      |       |                     |        |                    |       |       |
| High Bitter                    |                                     |        |                   |        |                   |        |                      |       |                     |        |                    |       |       |
| Moderate                       | 0.87 (0.66, 1.15)                   | 0.327  | 1.00              | –      |                   |        |                      |       |                     |        |                    |       |       |
| High                           | 1.37 (0.99, 1.90)                   | 0.056  | 1.00              | –      |                   |        |                      |       |                     |        |                    |       |       |
| High Umami                     |                                     |        |                   |        |                   |        |                      |       |                     |        |                    |       |       |
| Moderate                       | 1.13 (0.85, 1.51)                   | 0.327  | 1.30 (0.97, 1.73) | 0.075  | 1.00              | –      |                      |       |                     |        |                    |       |       |
| High                           | 1.27 (0.93, 1.71)                   | 0.128  | 0.92 (0.68, 1.25) | 0.602  | 1.00              | –      |                      |       |                     |        |                    |       |       |
| Low Bitter & Umami             |                                     |        |                   |        |                   |        |                      |       |                     |        |                    |       |       |
| Moderate                       | 1.93 (1.44, 2.57)                   | 0.402  | 2.21 (1.66, 2.95) | <0.001 | 1.70 (1.28, 2.27) | <0.001 | 1.00                 | –     |                     |        |                    |       |       |
| High                           | 1.16 (0.91, 1.49)                   | 0.229  | 0.85 (0.66, 1.09) | 0.196  | 0.92 (0.72, 1.18) | 0.514  | 1.00                 | –     |                     |        |                    |       |       |
| High All But Bitter            |                                     |        |                   |        |                   |        |                      |       |                     |        |                    |       |       |
| Moderate                       | 1.17 (0.86, 1.59)                   | <0.001 | 1.34 (0.99, 1.82) | 0.061  | 1.03 (0.76, 1.40) | 0.836  | 0.61 (0.45, 0.83)    | 0.002 | 1.00                | –      |                    |       |       |
| High                           | 1.13 (0.82, 1.54)                   | 0.460  | 0.82 (0.60, 1.12) | 0.212  | 0.89 (0.65, 1.22) | 0.463  | 0.97 (0.70, 1.33)    | 0.830 | 1.00                | –      |                    |       |       |
| High All But Umami             |                                     |        |                   |        |                   |        |                      |       |                     |        |                    |       |       |
| Moderate                       | 1.60 (1.18, 2.18)                   | 0.320  | 1.84 (1.34, 2.53) | <0.001 | 1.42 (1.03, 1.94) | 0.031  | 0.83 (0.60, 1.14)    | 0.255 | 1.37 (1.00, 1.88)   | 0.470  | 1.00               | –     |       |
| High                           | 1.99 (1.45, 2.74)                   | <0.001 | 1.45 (1.05, 2.00) | 0.023  | 1.57 (1.14, 2.17) | 0.006  | 1.71 (1.23, 2.37)    | 0.001 | 1.77 (1.28, 2.44)   | <0.001 | 1.00               | –     |       |
| Global $p$ -value <sup>3</sup> |                                     |        |                   |        |                   |        |                      |       |                     |        |                    |       | 0.631 |

<sup>1</sup>Values are ORs (95% CI) estimated via multinomial logistic regression, with adjustment for age, sex, physical activity, smoking status, use of antihypertensive and cholesterol lowering medication, type 2 diabetes, and BMI. Veg/Fruit/WG, Vegetables, Fruits, and Whole Grains dietary pattern.

<sup>2</sup> $p$ -values from Chi Square tests for differences from the reference taste perception profile (calculated by column).

<sup>3</sup> $p$ -value from log likelihood ratio test of joint significance in fully adjusted multinomial logistic regression models. Only 1  $p$ -value is provided, as it is identical for all models regardless of the reference profile.

**Supplementary Table S4.** ORs and corresponding 95% CIs of moderate or high relative to low adherence to the Non-EVOO/Sweet/RG dietary pattern among participants with each taste perception profile.

|                                | Reference taste perception profiles |        |                   |        |                   |        |                      |       |                     |        |                    |       | $p^3$ |
|--------------------------------|-------------------------------------|--------|-------------------|--------|-------------------|--------|----------------------|-------|---------------------|--------|--------------------|-------|-------|
|                                | Low All                             |        | High Bitter       |        | High Umami        |        | Low Bitter and Umami |       | High All But Bitter |        | High All But Umami |       |       |
|                                | OR (95% CI)                         | $p^2$  | OR (95% CI)       | $p^2$  | OR (95% CI)       | $p^2$  | OR (95% CI)          | $p^2$ | OR (95% CI)         | $p^2$  | OR (95% CI)        | $p^2$ |       |
| Low All                        |                                     |        |                   |        |                   |        |                      |       |                     |        |                    |       |       |
| Moderate                       | 1.00                                | —      |                   |        |                   |        |                      |       |                     |        |                    |       |       |
| High                           | 1.00                                | —      |                   |        |                   |        |                      |       |                     |        |                    |       |       |
| High Bitter                    |                                     |        |                   |        |                   |        |                      |       |                     |        |                    |       |       |
| Moderate                       | 0.91 (0.67, 1.22)                   | 0.521  | 1.00              | —      |                   |        |                      |       |                     |        |                    |       |       |
| High                           | 1.24 (0.90, 1.71)                   | 0.182  | 1.00              | —      |                   |        |                      |       |                     |        |                    |       |       |
| High Umami                     |                                     |        |                   |        |                   |        |                      |       |                     |        |                    |       |       |
| Moderate                       | 2.31 (1.72, 3.10)                   | <0.001 | 2.54 (1.90, 3.39) | <0.001 | 1.00              | —      |                      |       |                     |        |                    |       |       |
| High                           | 1.70 (1.30, 2.22)                   | <0.001 | 1.37 (1.05, 1.78) | 0.019  | 1.00              | —      |                      |       |                     |        |                    |       |       |
| Low Bitter & Umami             |                                     |        |                   |        |                   |        |                      |       |                     |        |                    |       |       |
| Moderate                       | 1.77 (1.34, 2.34)                   | <0.001 | 1.95 (1.48, 2.58) | <0.001 | 0.77 (0.58, 1.02) | 0.066  | 1.00                 | —     |                     |        |                    |       |       |
| High                           | 1.75 (1.34, 2.27)                   | <0.001 | 1.41 (1.08, 1.82) | 0.010  | 1.03 (0.79, 1.34) | 0.844  | 1.00                 | —     |                     |        |                    |       |       |
| High All But Bitter            |                                     |        |                   |        |                   |        |                      |       |                     |        |                    |       |       |
| Moderate                       | 1.09 (0.80, 1.46)                   | 0.590  | 1.20 (0.88, 1.62) | 0.246  | 0.47 (0.35, 0.63) | <0.001 | 0.61 (0.45, 0.83)    | 0.002 | 1.00                | —      |                    |       |       |
| High                           | 1.81 (1.29, 2.53)                   | <0.001 | 1.45 (1.04, 2.03) | 0.028  | 1.06 (0.75, 1.49) | 0.729  | 1.03 (0.74, 1.45)    | 0.844 | 1.00                | —      |                    |       |       |
| High All But Umami             |                                     |        |                   |        |                   |        |                      |       |                     |        |                    |       |       |
| Moderate                       | 2.31 (1.62, 3.29)                   | <0.001 | 2.54 (1.78, 3.63) | <0.001 | 1.00 (0.70, 1.43) | 0.998  | 1.30 (0.91, 1.86)    | 0.149 | 2.12 (1.49, 3.03)   | <0.001 | 1.00               | —     |       |
| High                           | 1.52 (1.14, 2.02)                   | 0.005  | 1.22 (0.91, 1.63) | 0.178  | 0.89 (0.66, 1.20) | 0.450  | 0.87 (0.65, 1.17)    | 0.349 | 0.84 (0.63, 1.12)   | 0.238  | 1.00               | —     |       |
| Global $p$ -value <sup>3</sup> |                                     |        |                   |        |                   |        |                      |       |                     |        |                    |       | 0.372 |

<sup>1</sup>Values are ORs (95% CI) estimated via multinomial logistic regression, with adjustment for age, sex, physical activity, smoking status, use of antihypertensive and cholesterol lowering medication, type 2 diabetes, and BMI. EVOO, Extra virgin olive oil; Non-EVOO/Sweet/RG, Non-EVOO, Sweets, and Refined Grains dietary pattern.

<sup>2</sup> $p$ -values from Chi Square tests for differences from the reference taste perception profile (calculated by column).

<sup>3</sup> $p$ -value from log likelihood ratio test of joint significance in fully adjusted multinomial logistic regression models. Only 1  $p$ -value is provided, as it is identical for all models regardless of the reference profile.

**Supplementary Table S5.** ORs and corresponding 95% CIs of moderate or high relative to low adherence to the Alch/Salt/AnimFat dietary pattern among participants with each taste perception profile.

|                                | Reference taste perception profiles |        |                   |        |                   |        |                    |        |                     |       |                    |       | $p^3$ |
|--------------------------------|-------------------------------------|--------|-------------------|--------|-------------------|--------|--------------------|--------|---------------------|-------|--------------------|-------|-------|
|                                | Low All                             |        | High Bitter       |        | High Umami        |        | Low Bitter & Umami |        | High All But Bitter |       | High All But Umami |       |       |
|                                | OR (95% CI)                         | $p^2$  | OR (95% CI)       | $p^2$  | OR (95% CI)       | $p^2$  | OR (95% CI)        | $p^2$  | OR (95% CI)         | $p^2$ | OR (95% CI)        | $p^2$ |       |
| Low All                        |                                     |        |                   |        |                   |        |                    |        |                     |       |                    |       |       |
| Moderate                       | 1.00                                | –      |                   |        |                   |        |                    |        |                     |       |                    |       |       |
| High                           | 1.00                                | –      |                   |        |                   |        |                    |        |                     |       |                    |       |       |
| High Bitter                    |                                     |        |                   |        |                   |        |                    |        |                     |       |                    |       |       |
| Moderate                       | 0.43 (0.33, 0.57)                   | <0.001 | 1.00              | –      |                   |        |                    |        |                     |       |                    |       |       |
| High                           | 1.18 (0.83, 1.68)                   | 0.360  | 1.00              | –      |                   |        |                    |        |                     |       |                    |       |       |
| High Umami                     |                                     |        |                   |        |                   |        |                    |        |                     |       |                    |       |       |
| Moderate                       | 1.23 (0.90, 1.66)                   | 0.189  | 2.84 (2.11, 3.81) | <0.001 | 1.00              | –      |                    |        |                     |       |                    |       |       |
| High                           | 1.17 (0.90, 1.52)                   | 0.242  | 0.99 (0.77, 1.28) | 0.953  | 1.00              | –      |                    |        |                     |       |                    |       |       |
| Low Bitter & Umami             |                                     |        |                   |        |                   |        |                    |        |                     |       |                    |       |       |
| Moderate                       | 0.73 (0.53, 1.01)                   | 0.057  | 1.69 (1.23, 2.31) | 0.001  | 0.60 (0.43, 0.82) | 0.001  | 1.00               | –      |                     |       |                    |       |       |
| High                           | 0.71 (0.56, 0.92)                   | 0.009  | 0.61 (0.48, 0.77) | <0.001 | 0.61 (0.48, 0.78) | <0.001 | 1.00               | –      |                     |       |                    |       |       |
| High All But Bitter            |                                     |        |                   |        |                   |        |                    |        |                     |       |                    |       |       |
| Moderate                       | 0.68 (0.49, 0.95)                   | 0.024  | 1.57 (1.12, 2.21) | 0.009  | 0.55 (0.40, 0.77) | <0.001 | 0.93 (0.67, 1.30)  | 0.681  | 1.00                | –     |                    |       |       |
| High                           | 1.29 (0.95, 1.76)                   | 0.099  | 1.10 (0.81, 1.49) | 0.545  | 1.11 (0.82, 1.49) | 0.506  | 1.81 (1.33, 2.47)  | <0.001 | 1.00                | –     |                    |       |       |
| High All But Umami             |                                     |        |                   |        |                   |        |                    |        |                     |       |                    |       |       |
| Moderate                       | 0.55 (0.40, 0.75)                   | <0.001 | 1.27 (0.94, 1.70) | 0.117  | 0.45 (0.32, 0.62) | <0.001 | 0.75 (0.55, 1.02)  | 0.069  | 0.80 (0.59, 1.10)   | 0.176 | 1.00               | –     |       |
| High                           | 0.95 (0.70, 1.29)                   | 0.731  | 0.80 (0.60, 1.07) | 0.135  | 0.81 (0.59, 1.11) | 0.191  | 1.33 (0.98, 1.80)  | 0.067  | 0.73 (0.54, 0.99)   | 0.045 | 1.00               | –     |       |
| Global $p$ -value <sup>3</sup> |                                     |        |                   |        |                   |        |                    |        |                     |       |                    |       | 0.350 |

<sup>1</sup>Values are ORs (95% CI) estimated via multinomial logistic regression, with adjustment for age, sex, physical activity, smoking status, use of antihypertensive and cholesterol lowering medication, type 2 diabetes, and BMI. Alch/Salt/AnimFat, Alcohol, Salty Foods, and Animal Fats dietary pattern.

<sup>2</sup> $p$ -values from Chi Square tests for differences from the reference taste perception profile (calculated by column).

<sup>3</sup> $p$ -value from log likelihood ratio test of joint significance in fully adjusted multinomial logistic regression models. Only 1  $p$ -value is provided, as it is identical for all models regardless of the reference profile.
